# Supplementary material for: Real-World Sarilumab Use and Rule Testing to Predict Treatment Response in Patients with Rheumatoid Arthritis: Findings from the RISE Registry
Source: Springer Nature journal article supplement (doi:10.1007/s40744-023-00568-8), 2023-06-22
Supplement: MOESM1 [file 40744_2023_568_MOESM1_ESM.pdf]

1 **ORIGINAL RESEARCH**

2

3 **Real-World Sarilumab Use and Rule Testing to Predict Treatment Response in Patients**  
4 **with Rheumatoid Arthritis: Findings from the RISE Registry**

5 Jeffrey R Curtis<sup>1\*</sup> (0000-0002-8907-8976), Huifeng Yun<sup>1a</sup>, Lang Chen<sup>1b</sup>, Stephanie S Ford<sup>1</sup>,

6 Hubert van Hoogstraten<sup>2</sup>, Stefano Fiore<sup>2</sup> (ID: 0000-0002-3785-2448), Kerri Ford<sup>3</sup>, Amy

7 Praestgaard<sup>3</sup>, Markus Rehberg<sup>4</sup>, Ernest Choy<sup>5</sup> (0000-0003-4459-8609)

8

9 <sup>1</sup>University of Alabama at Birmingham, Birmingham, AL, United States of America

10 <sup>2</sup>Sanofi, Bridgewater, NJ, United States of America

11 <sup>3</sup>Sanofi, Cambridge, MA, United States of America

12 <sup>4</sup>Sanofi, Frankfurt, Germany

13 <sup>5</sup>CREATE Centre, Cardiff University, Cardiff, United Kingdom

14

15 *<sup>a</sup>Affiliation at the time of the study, currently an employee of GSK and an adjunct professor*  
16 *at the University of Alabama at Birmingham.*

17 *<sup>b</sup>Affiliation at the time of study.*

18

19 **\*Corresponding author**

20 Jeffrey R Curtis, University of Alabama at Birmingham, Birmingham, Alabama 35233,

21 United States of America. Phone: +1-205-975-2176. E-mail: [jrcurtis@uabmc.edu](mailto:jrcurtis@uabmc.edu)

22

23

24 **Supplementary Material**

25 **Figure S1: Association between CRP and CDAI in sarilumab-treated patients**

26 CDAI, Clinical Disease Activity Index; CRP, C-reactive protein

27

28 **Figure S2: Association between CRP and CDAI in sarilumab-treated patients with CRP**

29 **<40 mg/L**

30 **a) CDAI at follow-up**

31 **b) Change of CDAI at follow-up**

32 CDAI, Clinical Disease Activity Index; CRP, C-reactive protein

33

34 **Table S1: Characteristics of sarilumab initiators at different time points relative to FDA**  
 35 **approval**

|                                                              | Years of sarilumab initiation |                   |                   |                   | P-value |
|--------------------------------------------------------------|-------------------------------|-------------------|-------------------|-------------------|---------|
|                                                              | 2017                          | 2018              | 2019              | 2020              |         |
| <i>N</i>                                                     | 304                           | 1237              | 1217              | 191               | -       |
| Age (years), mean ± SD                                       | 56.5 (10.3)                   | 55.0 (11.9)       | 55.8 (12.5)       | 57.6 (12.5)       | 0.06    |
| Women                                                        | 249 (81.9)                    | 1029 (83.2)       | 1007 (82.7)       | 162 (84.8)        | -       |
| Race                                                         |                               |                   |                   |                   | 0.58    |
| White                                                        | 221 (72.7)                    | 897 (72.5)        | 863 (70.9)        | 126 (66.0)        |         |
| Black/African American                                       | 16 (5.3)                      | 110 (8.9)         | 119 (9.8)         | 26 (13.6)         |         |
| Other/Missing                                                | 67 (22.0)                     | 230 (18.6)        | 235 (19.3)        | 39 (20.4)         |         |
| Ambulatory visits, mean ± SD <sup>a</sup>                    | 18.6 (20.9)                   | 13.9 (13.8)       | 14.5 (14.7)       | 15.6 (15.5)       | 0.05    |
| CDAI score ( <i>n</i> = 725), median (25th, 75th)            | 22.0 (14.0, 29.0)             | 18.5 (12.0, 28.0) | 19.0 (11.5, 28.5) | 19.8 (13.5, 28.5) | 0.28    |
| CDAI category at baseline ( <i>n</i> = 919)                  |                               |                   |                   |                   | 0.20    |
| High                                                         | 31 (35.2)                     | 136 (33.8)        | 117 (31.8)        | 22 (36.1)         |         |
| Moderate                                                     | 39 (44.3)                     | 146 (36.3)        | 126 (34.2)        | 28 (45.9)         |         |
| Low                                                          | 14 (15.9)                     | 91 (22.6)         | 97 (26.4)         | 7 (11.5)          |         |
| Remission                                                    | 4 (4.6)                       | 29 (7.2)          | 28 (7.6)          | 4 (6.6)           |         |
| RAPID3 score ( <i>n</i> = 990), median (25th, 75th)          | 12.7 (7.5, 18.3)              | 14.8 (8.7, 19.5)  | 14.8 (10.0, 19.8) | 15.0 (9.3, 19.0)  | 0.13    |
| RAPID3 category at baseline ( <i>n</i> = 1450)               |                               |                   |                   |                   | 0.96    |
| High                                                         | 74 (54.8)                     | 396 (59.2)        | 337 (60.3)        | 55 (63.2)         |         |
| Moderate                                                     | 35 (25.9)                     | 163 (24.4)        | 124 (22.2)        | 18 (20.7)         |         |
| Low                                                          | 15 (11.1)                     | 64 (9.6)          | 54 (9.7)          | 9 (10.3)          |         |
| Remission                                                    | 11 (8.2)                      | 46 (6.9)          | 44 (7.9)          | 5 (5.8)           |         |
| RA-related characteristics                                   |                               |                   |                   |                   |         |
| Current/recent MTX use <sup>a</sup>                          | 117 (38.5)                    | 482 (39.0)        | 452 (37.1)        | 74 (38.7)         | 0.82    |
| History of MTX use                                           | 206 (67.8)                    | 795 (64.3)        | 787 (64.7)        | 116 (60.7)        | 0.45    |
| csDMARD use in history count, mean ± SD                      | 1.6 (1.1)                     | 1.5 (1.0)         | 1.5 (1.0)         | 1.5 (1.1)         | 0.19    |
| History of TNFi use                                          | 216 (71.1)                    | 875 (70.7)        | 839 (68.9)        | 124 (64.9)        | 0.35    |
| History of b/tsDMARDs                                        | 275 (90.5)                    | 1101 (89.0)       | 1068 (87.8)       | 164 (85.9)        | 0.33    |
| Non-TNFi use in history count, mean ± SD                     | 1.0 (1.0)                     | 0.8 (0.9)         | 0.7 (0.8)         | 0.7 (0.9)         | <0.01   |
| History of tocilizumab use                                   | 143 (47.0)                    | 409 (33.1)        | 351 (28.8)        | 49 (25.7)         | <0.01   |
| History of non-TNFi or JAKi count, mean ± SD                 | 1.5 (1.3)                     | 1.2 (1.1)         | 1.2 (1.1)         | 1.2 (1.1)         | 0.01    |
| History of biologics (TNFi, non-TNFi, JAKi) count, mean ± SD | 2.7 (2.1)                     | 2.4 (1.8)         | 2.4 (1.8)         | 2.4 (1.9)         | 0.16    |

|                                                                           | Years of sarilumab initiation |             |             |             | P-value |
|---------------------------------------------------------------------------|-------------------------------|-------------|-------------|-------------|---------|
|                                                                           | 2017                          | 2018        | 2019        | 2020        |         |
| Current/recent oral steroid use <sup>a</sup>                              | 178 (58.6)                    | 738 (59.7)  | 699 (57.4)  | 121 (63.4)  | 0.40    |
| Current/recent opioid use <sup>a</sup>                                    | 70 (23.0)                     | 256 (20.7)  | 174 (14.3)  | 32 (16.8)   | <0.01   |
| RF positive ( <i>n</i> = 997) <sup>b</sup>                                | 65 (21.4)                     | 235 (19.0)  | 214 (17.6)  | 40 (20.9)   | 0.04    |
| MDHAQ at baseline ( <i>n</i> = 427), mean ± SD                            | 0.26 (0.38)                   | 0.38 (0.36) | 0.39 (0.41) | 0.47 (0.30) | 0.03    |
| CRP at/around index date ( <i>n</i> = 1189), mg/L, mean ± SD <sup>a</sup> | 9.5 (12.6)                    | 11.6 (22.2) | 11.1 (20.6) | 12.9 (17.9) | 0.10    |
| Comorbidities and indices                                                 |                               |             |             |             |         |
| Diabetes diagnosis/medication/laboratory results in history               | 41 (13.5)                     | 172 (13.9)  | 183 (15.0)  | 38 (19.9)   | 0.16    |
| COPD diagnosis in history                                                 | 5 (1.6)                       | 25 (2.0)    | 20 (1.6)    | 4 (2.1)     | 0.90    |
| Hypertension diagnosis in history                                         | 43 (14.1)                     | 139 (11.2)  | 138 (11.3)  | 28 (14.7)   | 0.29    |
| RDCI in history, mean ± SD                                                | 0.56 (1.13)                   | 0.49 (0.98) | 0.47 (0.96) | 0.69 (1.18) | 0.04    |
| Rx Risk count in history, mean ± SD <sup>c</sup>                          | 9.6 (4.7)                     | 8.9 (4.7)   | 9.0 (4.9)   | 9.8 (5.1)   | 0.02    |
| Elixhauser in history, mean ± SD                                          | 1.9 (1.3)                     | 1.6 (1.1)   | 1.6 (1.2)   | 1.8 (1.4)   | <0.01   |

All the numbers in the table are *n* (%) unless indicated otherwise.

<sup>a</sup>Measured at the 12-month period prior to sarilumab initiation

<sup>b</sup>Denominator includes RF positive, negative, and missing. If excluding missing, the percentages would be 51.6, 56.1, 56.0, and 57.1% for 2017, 2018, 2019, and 2022, respectively (*p* = 0.82)

<sup>c</sup>Comorbidity based on prescription use

b/tsDMARD, biologic/targeted synthetic disease modifying antirheumatic drug; CDAI, Clinical Disease Activity Index; COPD, chronic obstructive pulmonary disease; CRP, C-reactive protein; csDMARD, conventional synthetic disease-modifying antirheumatic drug; FDA, Food and Drug Administration; JAKi, Janus kinase inhibitor; MDHAQ, Multidimensional Health Assessment Questionnaire; MTX, methotrexate; RA, rheumatoid arthritis; RDCI, Rheumatic Disease Comorbidity Index; RAPID3, Routine Assessment of Patient Index Data 3; RF, rheumatoid factor; Rx, prescription; SD, Standard deviation; TNFi, tumor necrosis factor inhibitors

37 **Table S2: Baseline demographic and clinical characteristics in Cohorts A, B, and C for**  
 38 **change in CDAI in month 6 ( $\pm 3$ ) compared to index date**

|                                       |               | <b>Cohort A</b> | <b>Cohort B</b> | <b>Cohort C</b> |
|---------------------------------------|---------------|-----------------|-----------------|-----------------|
| Number of patients                    | <i>N</i>      | 545             | 330             | 439             |
| Age (years)                           | Mean $\pm$ SD | 56.0 (11.6)     | 56.8 (11.9)     | 53.7 (11.4)     |
| Sex                                   | Male          | 94 (17.2)       | 54 (16.4)       | 89 (20.2)       |
|                                       | Female        | 451 (82.8)      | 276 (83.6)      | 350 (79.8)      |
| Race                                  | Black         | 40 (7.3)        | 29 (8.8)        | 45 (10.3)       |
|                                       | White         | 377 (69.2)      | 224 (67.9)      | 296 (67.3)      |
|                                       | Other/missing | 128 (23.5)      | 77 (23.3)       | 99 (22.4)       |
| Index year                            | 2017          | 71 (13.0)       | 49 (14.8)       | 84 (19.2)       |
|                                       | 2018          | 280 (51.4)      | 167 (50.6)      | 258 (58.8)      |
|                                       | 2019          | 194 (35.6)      | 114 (34.5)      | 96 (22.0)       |
| Seropositive                          | Positive      | 192 (35.2)      | 107 (32.4)      | 157 (35.9)      |
|                                       | Negative      | 84 (15.4)       | 42 (12.7)       | 50 (11.4)       |
|                                       | Missing       | 269 (49.4)      | 181 (54.8)      | 232 (52.7)      |
| CDAI at index date                    | Mean $\pm$ SD | 21.0 (12.4)     | 23.6 (11.9)     | 30.9 (16.6)     |
| csDMARD at 1-year baseline            | Yes           | 319 (58.5)      | 177 (53.6)      | 231 (52.7)      |
| MTX at 1-year baseline                | Yes           | 190 (34.9)      | 111 (33.6)      | 146 (33.2)      |
| History of TNFi                       | Yes           | 388 (71.2)      | 228 (69.1)      | 272 (62.0)      |
| History of JAKi                       | Yes           | 240 (44.0)      | 161 (48.8)      | 185 (42.2)      |
| History of non-TNFi bDMARDs           | Yes           | 288 (52.8)      | 180 (54.5)      | 242 (55.1)      |
| Rx of oral steroid at 1-year baseline | Yes           | 312 (57.2)      | 191 (57.9)      | 269 (61.3)      |
| Rx of opioid at 1-year baseline       | Yes           | 94 (17.2)       | 53 (16.1)       | 59 (13.4)       |

All the numbers in the table are *n* (%) unless indicated otherwise  
 bDMARD, biologic disease modifying antirheumatic drug; CDAI, Clinical Disease Activity Index;  
 csDMARD, conventional synthetic disease modifying antirheumatic drug; JAKi, Janus kinase inhibitors;  
 MTX, methotrexate; Rx, prescription; SD, standard deviation; TNFi, tumor necrosis factor inhibitors

40 **Table S3: Baseline demographic and clinical characteristics in Cohorts A, B, and C for**  
 41 **change in CDAI in month 12 ( $\pm 3$ ) compared to index date**

|                                       |               | <b>Cohort A</b> | <b>Cohort B</b> | <b>Cohort C</b> |
|---------------------------------------|---------------|-----------------|-----------------|-----------------|
| Number of patients                    | <i>N</i>      | 326             | 204             | 341             |
| Age (years)                           | Mean $\pm$ SD | 55.9 (11.4)     | 56.8 (11.4)     | 54.0 (10.7)     |
| Sex                                   | Male          | 58 (17.8)       | 36 (17.6)       | 73 (21.5)       |
|                                       | Female        | 268 (82.2)      | 168 (82.4)      | 268 (78.5)      |
| Race                                  | Black         | 19 (5.8)        | 14 (6.9)        | 29 (8.4)        |
|                                       | White         | 233 (71.5)      | 147 (72.1)      | 237 (69.5)      |
|                                       | Other/missing | 74 (22.7)       | 43 (21.1)       | 76 (22.1)       |
| Index year                            | 2017          | 56 (17.2)       | 40 (19.6)       | 78 (22.9)       |
|                                       | 2018          | 227 (69.6)      | 141 (69.1)      | 229 (67.0)      |
|                                       | 2019          | 43 (13.2)       | 23 (11.3)       | 34 (10.1)       |
| Seropositive                          | Positive      | 119 (36.5)      | 67 (32.8)       | 125 (36.7)      |
|                                       | Negative      | 57 (17.5)       | 31 (15.2)       | 39 (11.4)       |
|                                       | Missing       | 150 (46.0)      | 106 (52.0)      | 177 (51.9)      |
| CDAI at index date                    | Mean $\pm$ SD | 21.1 (12.9)     | 23.9 (12.6)     | 31.6 (17.2)     |
| csDMARD at 1-year baseline            | Yes           | 195 (59.8)      | 113 (55.4)      | 182 (53.4)      |
| MTX at 1-year baseline                | Yes           | 115 (35.3)      | 72 (35.3)       | 115 (33.6)      |
| History of TNFi                       | Yes           | 237 (72.7)      | 144 (70.6)      | 218 (63.8)      |
| History of JAKi                       | Yes           | 137 (42.0)      | 96 (47.1)       | 137 (40.0)      |
| History of non-TNFi bDMARDs           | Yes           | 183 (56.1)      | 117 (57.4)      | 197 (57.6)      |
| Rx of oral steroid at 1-year baseline | Yes           | 188 (57.7)      | 118 (57.8)      | 203 (59.5)      |
| Rx of opioid at 1-year baseline       | Yes           | 61 (18.7)       | 40 (19.6)       | 51 (14.9)       |

All the numbers in the table are *n* (%) unless indicated otherwise

bDMARD, biologic disease modifying antirheumatic drug; CDAI, Clinical Disease Activity Index; csDMARD, conventional synthetic disease modifying antirheumatic drug; JAKi, Janus kinase inhibitors; MTX, methotrexate; Rx, prescription; SD, standard deviation; TNFi, tumor necrosis factor inhibitors

43 **Table S4: Baseline demographic and clinical characteristics in Cohorts A, B, and C for**  
 44 **change in RAPID3 in month 6 ( $\pm 3$ ) compared to index date**

|                                       |               | <b>Cohort A</b> | <b>Cohort B</b> | <b>Cohort C</b> |
|---------------------------------------|---------------|-----------------|-----------------|-----------------|
| Number of patients                    | <i>N</i>      | 710             | 476             | 759             |
| Age (years)                           | Mean $\pm$ SD | 55.7 (11.2)     | 55.6 (11.8)     | 52.8 (11.8)     |
| Sex                                   | Male          | 112 (15.8)      | 72 (15.1)       | 143 (18.8)      |
|                                       | Female        | 598 (84.2)      | 404 (84.9)      | 616 (81.2)      |
| Race                                  | Black         | 77 (10.8)       | 58 (12.2)       | 93 (12.3)       |
|                                       | White         | 512 (72.1)      | 336 (70.6)      | 517 (68.2)      |
|                                       | Other/missing | 121 (17.0)      | 82 (17.2)       | 148 (19.5)      |
| Index year                            | 2017          | 89 (12.5)       | 53 (11.1)       | 83 (10.9)       |
|                                       | 2018          | 382 (53.8)      | 258 (54.2)      | 492 (64.8)      |
|                                       | 2019          | 239 (33.7)      | 165 (34.7)      | 185 (24.3)      |
| Seropositive                          | Positive      | 180 (25.4)      | 125 (26.3)      | 216 (28.5)      |
|                                       | Negative      | 169 (23.8)      | 99 (20.8)       | 127 (16.7)      |
|                                       | Missing       | 361 (50.8)      | 252 (52.9)      | 416 (54.8)      |
| CDAI at index date                    | Mean $\pm$ SD | 14.1 (6.8)      | 15.4 (5.8)      | 15.8 (5.8)      |
| csDMARD at 1-year baseline            | Yes           | 435 (61.3)      | 284 (59.7)      | 451 (59.4)      |
| MTX at 1-year baseline                | Yes           | 271 (38.2)      | 185 (38.9)      | 294 (38.7)      |
| History of TNFi                       | Yes           | 503 (70.8)      | 335 (70.4)      | 487 (64.2)      |
| History of JAKi                       | Yes           | 316 (44.5)      | 229 (48.1)      | 337 (44.4)      |
| History of non-TNFi bDMARDs           | Yes           | 407 (57.3)      | 275 (57.8)      | 422 (55.6)      |
| Rx of oral steroid at 1-year baseline | Yes           | 424 (59.7)      | 286 (60.1)      | 476 (62.7)      |
| Rx of opioid at 1-year baseline       | Yes           | 136 (19.2)      | 98 (20.6)       | 148 (19.5)      |

All the numbers in the table are *n* (%) unless indicated otherwise  
 bDMARD, biologic disease modifying antirheumatic drug; CDAI, Clinical Disease Activity Index;  
 csDMARD, conventional synthetic disease modifying antirheumatic drug; JAKi, Janus kinase inhibitors;  
 MTX, methotrexate; Rx, prescription; SD, standard deviation; TNFi, tumor necrosis factor inhibitors



46 **Table S5: Baseline demographic and clinical characteristics in Cohorts A, B, and C for**  
 47 **change in RAPID3 in month 12 ( $\pm 3$ ) compared to index date**

|                                       |               | <b>Cohort A</b> | <b>Cohort B</b> | <b>Cohort C</b> |
|---------------------------------------|---------------|-----------------|-----------------|-----------------|
| Number of patients                    | <i>N</i>      | 422             | 295             | 585             |
| Age (years)                           | Mean $\pm$ SD | 55.5 (11.4)     | 55.4 (11.6)     | 52.7 (11.4)     |
| Sex                                   | Male          | 69 (16.4)       | 49 (16.6)       | 117 (20.0)      |
|                                       | Female        | 353 (83.6)      | 246 (83.4)      | 467 (80.0)      |
| Race                                  | Black         | 35 (8.3)        | 28 (9.5)        | 65 (11.1)       |
|                                       | White         | 310 (73.5)      | 213 (72.2)      | 397 (67.8)      |
|                                       | Other/missing | 77 (18.2)       | 54 (18.3)       | 123 (21.1)      |
| Index year                            | 2017          | 62 (14.7)       | 43 (14.6)       | 76 (12.9)       |
|                                       | 2018          | 318 (75.4)      | 218 (73.9)      | 452 (77.3)      |
|                                       | 2019          | 42 (10.0%)      | 34 (11.5%)      | 57 (9.7%)       |
| Seropositive                          | Positive      | 110 (26.1)      | 76 (25.8)       | 165 (28.2)      |
|                                       | Negative      | 87 (20.6)       | 55 (18.6)       | 89 (15.3)       |
|                                       | Missing       | 225 (53.3)      | 164 (55.6)      | 330 (56.5)      |
| CDAI at index date                    | Mean $\pm$ SD | 14.2 (6.7)      | 15.3 (5.9)      | 15.9 (5.9)      |
| csDMARD at 1-year baseline            | Yes           | 269 (63.7)      | 176 (59.7)      | 350 (59.9)      |
| MTX at 1-year baseline                | Yes           | 167 (39.6)      | 116 (39.3)      | 230 (39.4)      |
| History of TNFi                       | Yes           | 308 (73.0)      | 212 (71.9)      | 375 (64.2)      |
| History of JAKi                       | Yes           | 187 (44.3)      | 144 (48.8)      | 256 (43.9)      |
| History of non-TNFi bDMARDs           | Yes           | 240 (56.9)      | 173 (58.6)      | 326 (55.8)      |
| Rx of oral steroid at 1-year baseline | Yes           | 259 (61.4)      | 179 (60.7)      | 364 (62.3)      |
| Rx of opioid at 1-year baseline       | Yes           | 93 (22.0)       | 72 (24.4)       | 127 (21.7)      |

All the numbers in the table are *n* (%) unless indicated otherwise

bDMARD, biologic disease modifying antirheumatic drug; CDAI, Clinical Disease Activity Index; csDMARD, conventional synthetic disease modifying antirheumatic drug; JAKi, Janus kinase inhibitors; MTX, methotrexate; Rx, prescription; SD, standard deviation; TNFi, tumor necrosis factor inhibitors

49 **Table S6: Baseline demographic and clinical characteristics in sarilumab-treated**  
50 **patients categorized by seropositivity\* and CRP cutoff 12.3 mg/L (individual group**  
51 **data)**

|                                       |                   | Group 1     | Group 2     | Group 3     | Group 4     | P-value |
|---------------------------------------|-------------------|-------------|-------------|-------------|-------------|---------|
| Number of patients                    | <i>N</i>          | 53          | 91          | 11          | 50          |         |
| Age (years)                           | Mean ± SD         | 54.5 (11.7) | 53.6 (8.7)  | 49.1 (10.2) | 54.4 (12.0) | 0.16    |
| Sex                                   |                   |             |             |             |             | 0.58    |
|                                       | Male              | 7 (13.2)    | 18 (19.8)   | 3 (27.3)    | 11 (22.0)   |         |
|                                       | Female            | 46 (86.8)   | 73 (80.2)   | 8 (72.7)    | 39 (78.0)   |         |
| Race                                  |                   |             |             |             |             | 0.01    |
|                                       | Black             | 10 (18.9)   | 5 (5.5)     | 0 (0.0)     | 0 (0.0)     |         |
|                                       | White             | 32 (60.4)   | 62 (68.1)   | 10 (90.9)   | 39 (78.0)   |         |
|                                       | Other/<br>missing | 11 (20.8)   | 24 (26.4)   | 1 (9.1)     | 11 (22.0)   |         |
| CDAI at index date                    | Mean ± SD         | 25.5 (13.4) | 25.0 (10.9) | 31.1 (15.9) | 25.3 (9.5)  | 0.61    |
| CDAI category at index date           |                   |             |             |             |             | 0.47    |
|                                       | Moderate          | 27 (50.9)   | 47 (51.6)   | 4 (36.4)    | 20 (40.0)   |         |
|                                       | High              | 26 (49.1)   | 44 (48.4)   | 7 (63.6)    | 30 (60.0)   |         |
| csDMARD at 1-year baseline            | Yes               | 35 (66.0)   | 63 (69.2)   | 4 (36.4)    | 35 (70.0)   | 0.17    |
| MTX at 1-year baseline                | Yes               | 28 (52.8)   | 39 (42.9)   | 2 (18.2)    | 21 (42.0)   | 0.19    |
| Baseline csDMARD (excluding MTX)      | Yes               | 18 (34.0)   | 37 (40.7)   | 4 (36.4)    | 20 (40.0)   | 0.87    |
| History of TNFi                       | Yes               | 40 (75.5)   | 67 (73.6)   | 9 (81.8)    | 39 (78.0)   | 0.90    |
| History of JAKi                       | Yes               | 18 (34.0)   | 41 (45.1)   | 7 (63.6)    | 30 (60.0)   | 0.04    |
| History of non-TNFi agents            | Yes               | 22 (41.5)   | 46 (50.5)   | 7 (63.6)    | 33 (66.0)   | 0.08    |
| History of b/tsDMARDs                 | Yes               | 47 (88.7)   | 85 (93.4)   | 10 (90.9)   | 49 (98.0)   | 0.31    |
| Rx of oral steroid at 1-year baseline | Yes               | 36 (67.9)   | 63 (69.2)   | 9 (81.8)    | 27 (54.0)   | 0.18    |
| Rx of opioid at 1-year baseline       | Yes               | 11 (20.8)   | 16 (17.6)   | 3 (27.3)    | 14 (28.0)   | 0.51    |
| RF                                    |                   |             |             |             |             | <0.01   |
|                                       | Positive          | 23 (43.4)   | 44 (48.4)   | 0 (0.0)     | 0 (0.0)     |         |
|                                       | Negative          | 0 (0.0)     | 10 (11.0)   | 5 (45.5)    | 23 (46.0)   |         |
|                                       | Missing           | 30 (56.6)   | 37 (40.7)   | 6 (54.5)    | 27 (54.0)   |         |
| CRP at index date (-90 to 0 day)      | Mean ± SD         | 33.5 (29.2) | 2.7 (3.3)   | 26.9 (19.1) | 3.4 (3.4)   | <0.01   |

All the numbers in the table are *n* (%) unless indicated otherwise. Group 1: Seropositive and CRP >12.3 mg/L, Group 2: Seropositive and CRP ≤12.3 mg/L, Group 3: Seronegative and CRP >12.3 mg/L, Group 4: Seronegative and CRP ≤12.3 mg/L

\*Seropositive patients were defined as those with a history of ACPA-positive status or RF-positive status or any ICD-10 diagnosis code of M05

|                                                                                                                                                                                                                                                                                                                                                                                                                                                                              | <b>Group 1</b> | <b>Group 2</b> | <b>Group 3</b> | <b>Group 4</b> | <b><i>P</i>-value</b> |
|------------------------------------------------------------------------------------------------------------------------------------------------------------------------------------------------------------------------------------------------------------------------------------------------------------------------------------------------------------------------------------------------------------------------------------------------------------------------------|----------------|----------------|----------------|----------------|-----------------------|
| ACPA, anticyclic citrullinated peptide antibody; b/tsDMARD, biologic/targeted synthetic disease modifying antirheumatic drug; CDAI, Clinical Disease Activity Index; csDMARD, conventional synthetic disease modifying antirheumatic drug; ICD, International Classification of Diseases; CRP, C-reactive protein; JAKi, Janus kinase inhibitors; MTX, methotrexate; RF, rheumatoid factor; Rx, prescription; SD, standard deviation; TNFi, tumor necrosis factor inhibitors |                |                |                |                |                       |

52

53 **Table S7: Baseline demographic and clinical characteristics in sarilumab-treated**  
 54 **patients (rule-positive vs. rule-negative patients categorized based on seropositive status**  
 55 **and CRP cutoff at 5 mg/L)**

|                                       |               | <b>Rule-positive<sup>a</sup><br/>group</b> | <b>Rule-negative<sup>b</sup><br/>group</b> |
|---------------------------------------|---------------|--------------------------------------------|--------------------------------------------|
| Number of patients                    | <i>N</i>      | 72                                         | 133                                        |
| Age (years)                           | Mean ± SD     | 53.7 (10.9)                                | 53.8 (10.3)                                |
| Sex                                   | Male          | 11 (15.3)                                  | 28 (21.1)                                  |
|                                       | Female        | 61 (84.7)                                  | 105 (78.9)                                 |
| Race                                  | Black         | 10 (13.9)                                  | 5 (3.8)                                    |
|                                       | White         | 46 (63.9)                                  | 97 (72.9)                                  |
|                                       | Other/missing | 16 (22.2)                                  | 31 (23.3)                                  |
| CDAI at index date                    | Mean ± SD     | 27.1 (13.1)                                | 24.7 (10.6)                                |
| CDAI category at index date           | Moderate      | 32 (44.4)                                  | 66 (49.6)                                  |
|                                       | High          | 40 (55.6)                                  | 67 (50.4)                                  |
| csDMARD at 1-year baseline            | Yes           | 51 (70.8)                                  | 86 (64.7)                                  |
| MTX at 1-year baseline                | Yes           | 39 (54.2)                                  | 51 (38.3)                                  |
| Baseline csDMARD (excluding MTX)      | Yes           | 26 (36.1)                                  | 53 (39.8)                                  |
| History of TNFi                       | Yes           | 52 (72.2)                                  | 103 (77.4)                                 |
| History of JAKi                       | Yes           | 27 (37.5)                                  | 69 (51.9)                                  |
| History of non-TNFi agents            | Yes           | 32 (44.4)                                  | 76 (57.1)                                  |
| Rx of oral steroid at 1-year baseline | Yes           | 52 (72.2)                                  | 83 (62.4)                                  |
| Rx of opioid at 1-year baseline       | Yes           | 14 (19.4)                                  | 30 (22.6)                                  |
| RF                                    | Positive      | 37 (51.4)                                  | 30 (22.6)                                  |
|                                       | Negative      | 3 (4.2)                                    | 35 (26.3)                                  |
|                                       | Missing       | 32 (44.4)                                  | 68 (51.1)                                  |
| CRP at index date (−90 to 0 day)      | Mean ± SD     | 26.8 (27.4)                                | 4.2 (9.0)                                  |

All the numbers in the table are *n* (%) unless indicated otherwise

<sup>a</sup>Rule-positive patients are those with seropositive status and CRP level >12.3 mg/L. Seropositive patients were defined as those with a history of ACPA-positive status or RF-positive status or any ICD-10 diagnosis code of M05

<sup>b</sup>Rule-negative patients are those who do not meet the criteria of seropositive status and CRP level >12.3 mg/L.

ACPA, anticyclic citrullinated peptide antibody; CDAI, Clinical Disease Activity Index; csDMARD, conventional synthetic disease modifying antirheumatic drug; CRP, C-reactive protein; ICD, International Classification of Diseases; JAKi, Janus kinase inhibitors; MTX, methotrexate; RF, rheumatoid factor; Rx, prescription; SD, standard deviation; TNFi, tumor necrosis factor inhibitors

56

57 **Table S8: Baseline demographic and clinical characteristics in sarilumab-treated**  
 58 **patients categorized by seropositivity\* and CRP cutoff 5 mg/L (individual group data)**

|                                       |                   | <b>Group 1</b> | <b>Group 2</b> | <b>Group 3</b> | <b>Group 4</b> | <b>P-value</b> |
|---------------------------------------|-------------------|----------------|----------------|----------------|----------------|----------------|
| Number of patients                    | <i>N</i>          | 72             | 72             | 26             | 35             |                |
| Age (years)                           | Mean ± SD         | 53.7 (10.9)    | 54.1 (8.9)     | 51.3 (9.8)     | 55.0 (13.0)    | 0.33           |
| Sex                                   |                   |                |                |                |                | 0.74           |
|                                       | Male              | 11 (15.3)      | 14 (19.4)      | 6 (23.1)       | 8 (22.9)       |                |
|                                       | Female            | 61 (84.7)      | 58 (80.6)      | 20 (76.9)      | 27 (77.1)      |                |
| Race                                  |                   |                |                |                |                | 0.10           |
|                                       | Black             | 10 (13.9)      | 5 (6.9)        | 0 (0.0)        | 0 (0.0)        |                |
|                                       | White             | 46 (63.9)      | 48 (66.7)      | 21 (80.8)      | 28 (80.0)      |                |
|                                       | Other/<br>missing | 16 (22.2)      | 19 (26.4)      | 5 (19.2)       | 7 (20.0)       |                |
| CDAI at index date                    | Mean ± SD         | 27.1 (13.1)    | 23.3 (10.2)    | 27.0 (12.3)    | 25.8 (10.1)    | 0.27           |
| CDAI category at index date           |                   |                |                |                |                | 0.13           |
|                                       | Moderate          | 32 (44.4)      | 42 (58.3)      | 9 (34.6)       | 15 (42.9)      |                |
|                                       | High              | 40 (55.6)      | 30 (41.7)      | 17 (65.4)      | 20 (57.1)      |                |
| csDMARD at 1-year baseline            | Yes               | 51 (70.8)      | 47 (65.3)      | 16 (61.5)      | 23 (65.7)      | 0.82           |
| MTX at 1-year baseline                | Yes               | 39 (54.2)      | 28 (38.9)      | 10 (38.5)      | 13 (37.1)      | 0.19           |
| Baseline csDMARD (excluding MTX)      | Yes               | 26 (36.1)      | 29 (40.3)      | 8 (30.8)       | 16 (45.7)      | 0.64           |
| History of TNFi                       | Yes               | 52 (72.2)      | 55 (76.4)      | 20 (76.9)      | 28 (80.0)      | 0.84           |
| History of JAKi                       | Yes               | 27 (37.5)      | 32 (44.4)      | 16 (61.5)      | 21 (60.0)      | 0.06           |
| History of non-TNFi agents            | Yes               | 32 (44.4)      | 36 (50.0)      | 14 (53.8)      | 26 (74.3)      | 0.03           |
| Rx of oral steroid at 1-year baseline | Yes               | 52 (72.2)      | 47 (65.3)      | 16 (61.5)      | 20 (57.1)      | 0.44           |
| Rx of opioid at 1-year baseline       | Yes               | 14 (19.4)      | 13 (18.1)      | 8 (30.8)       | 9 (25.7)       | 0.50           |
| RF                                    |                   |                |                |                |                | 0.00           |
|                                       | Positive          | 37 (51.4)      | 30 (41.7)      | 0 (0.0)        | 0 (0.0)        |                |
|                                       | Negative          | 3 (4.2)        | 7 (9.7)        | 12 (46.2)      | 16 (45.7)      |                |
|                                       | Missing           | 32 (44.4)      | 35 (48.6)      | 14 (53.8)      | 19 (54.3)      |                |
| CRP at index date (−90 to 0 day)      | Mean ± SD         | 26.8 (27.4)    | 1.2 (1.6)      | 15.8 (15.6)    | 1.6 (1.7)      | 0.00           |

All the numbers in the table are *n* (%) unless indicated otherwise. Group 1: Seropositive and CRP >5 mg/L, Group 2: Seropositive and CRP ≤5 mg/L, Group 3: Seronegative and CRP >5 mg/L, Group 4: Seronegative and CRP ≤5 mg/L

\*Seropositive patients were defined as those with a history of ACPA-positive status or RF-positive status or any ICD-10 diagnosis code of M05

---

ACPA, anticyclic citrullinated peptide antibody; CDAI, Clinical Disease Activity Index; csDMARD, conventional synthetic disease modifying antirheumatic drug; CRP, C-reactive protein; ICD, International Classification of Diseases; JAKi, Janus kinase inhibitors; MTX, methotrexate; RF, rheumatoid factor; Rx, prescription; SD; standard deviation; TNFi, tumor necrosis factor inhibitors

60 **Table S9: Outcomes at 24 weeks in sarilumab-treated patients categorized by**  
 61 **seropositivity and CRP cutoff 12.3 mg/L**

| Outcome                                                               | Rule-positive patients (Group 1) | Rule-negative patients     |                            |                            | P-value |
|-----------------------------------------------------------------------|----------------------------------|----------------------------|----------------------------|----------------------------|---------|
|                                                                       |                                  | Group 2                    | Group 3                    | Group 4                    |         |
| CDAI LDA                                                              | 20 (37.7)                        | 30 (33.0)                  | 2 (18.2)                   | 12 (24.0)                  | 0.36    |
| CDAI remission                                                        | 5 (9.4)                          | 2 (2.2)                    | 0 (0.0)                    | 0 (0.0)                    | 0.04    |
| CDAI MCID                                                             | 20 (37.7)                        | 35 (38.5)                  | 2 (18.2%)                  | 16 (32.0)                  | 0.54    |
| $\Delta$ CDAI <sup>a</sup> , mean (SD)                                | -8.2 (13.9)                      | -7.4 (13.8)                | -5.8 (18.7)                | -4.4 (11.9)                | 0.16    |
| $\Delta$ CDAI <sup>a,b</sup> , LS mean (95% CI)                       | -7.6 (-11.9, -3.3)               | -7.6 (-11.9, -3.4)         | -2.3 (-10.0, 5.4)          | -4.6 (-9.4, 0.3)           | -       |
| <b>Odds ratio estimates<sup>b</sup>, point estimate (95% Wald CI)</b> |                                  | <b>Group 2 vs. Group 1</b> | <b>Group 3 vs. Group 1</b> | <b>Group 4 vs. Group 1</b> |         |
| CDAI LDA                                                              |                                  | 0.8 (0.4, 1.7)             | 0.4 (0.1, 2.1)             | 0.5 (0.2, 1.3)             |         |
| CDAI MCID                                                             |                                  | 1.2 (0.5, 3.0)             | 0.1 (0.0, 0.9)             | 0.8 (0.3, 2.4)             |         |

All the numbers in the table are *n* (%) unless indicated otherwise.

*P*-values were used to determine the difference between two or more groups. Group 1: Seropositive and CRP >12.3 mg/L, Group 2: Seropositive and CRP ≤12.3 mg/L, Group 3: Seronegative and CRP >12.3 mg/L, and Group 4: Seronegative and CRP ≤12.3 mg/L

<sup>a</sup>Change of CDAI from the index period to 3 to 9 months after the index date

<sup>b</sup>Adjusted for age, sex, race, TNFi, non-TNFi, steroid, diabetes, hypertension, number of Rx risk during baseline, and CDAI at index

CDAI, Clinical Disease Activity Index; CI, confidence interval; CRP, C-reactive protein; LDA, low disease activity; LS, least square; MCID, minimal clinically important difference; Rx, prescription; SD, standard deviation; TNFi, tumor necrosis factor inhibitors

62
